# Supplementary material for: Comparative genomics and genome biology of invasive Campylobacter jejuni
Source: PubMed Central journal article supplement (PMC4658567; doi:10.1038/srep17300), 2015-11-25
Supplement: srep17300-s1.pdf [file srep17300-s1.pdf]

Supplementary material ‘**Comparative genomics and genome biology of invasive**

***Campylobacter jejuni***’

C.P.A. Skarp

O. Akinrinade

A.J.E. Nilsson

P. Ellström

S. Myllykangas

H. Rautelin

**Legends**

Figure S1. Phylogenomic overview of 106 *C. jejuni* strains, including 55 *C. jejuni* strains belonging to the ST677CC lineage described in this study. Strains belonging to ST21CC (15 strains) are shaded green with reference strain 11168 bold-faced. Strains belonging to ST45CC (three strains) and ST283CC (strain 81116 only) are shaded red with reference strain 4031 bold-faced. The ST677CC strains (63 strains) are shaded blue and two strains (faecal strains 524 and 542) representing the two major STs (ST-677 and ST-794) belonging to this lineage are bold-faced. Due to the homogeneity in large parts of ST677CC, the majority of labels were removed to enhance clarity of the figure.

Five strains (255, 414, 1336, 30318 and K1) did not belong to any lineage and are black and bold-faced. The remaining strains belonged to ten different lineages, which are shaded as follows: ST22CC, orange (strains BJ-CJD101 and HB93-13); ST42CC, light green (strain 81-176); ST52CC, pink (strains 10186, 20176 and CG8421); ST353CC (strain R14) and ST354CC (strains RM1221 and S3), purple; ST362CC, teal (strains 260.94, HN-CJD07035, ICDCJ07001 and ICDCJ07002); ST403CC (strain ATCC33560) and ST460CC (strain

10227), light red; ST464CC, light green (strain Cj5) and ST574CC, yellow (strains 30286, CG8486 and Cj3).

Figure S2. Core genome analysis of 63 *C. jejuni* ST677CC strains. Number 1 represents the ST-794 strains; number 2 represents the ST-677 strains and includes one strain (OXC8290) typed as ST-6514, shaded purple. The Harvest suite tool Parsnp (<http://harvest.readthedocs.org/en/latest/content/parsnp.html>, last accessed on 22/04/2015) was used for core genome determination.

Figure S3. HS4 capsule locus of 55 *C. jejuni* strains belonging to the ST677CC lineage. (a) HS4 groups A-C. (b) HS4 group D.

Figure S4. Similarity of *C. jejuni* ST-794 Type III restriction modification system and *Mycoplasma* Type III RM. Number one (red arrow) represents the restriction subunit (2019 bp; 673 aa); number two (green arrow) represents the methylation subunit (1611 bp; 537 aa).

Figure S5. Artemis view of CJIE5 in ST-677 blood isolate 40. ORFs marked in yellow are considered to belong to CJIE5. The ORF marked in red represents a DNA/RNA non-specific endonuclease. Interproscan of the ORF marked in green found an adenine-specific DNA methylase signature, a Type III res subunit, and a DEAD-like helicase superfamily C-terminal domain.

Table S1. List of species included in our  $\epsilon$ -proteobacterial database for orthology querying.

Table S2. BlastP results of the ST-794 Type III res subunit against the Concise Microbial

## Protein Database

Table S3. Accession numbers of the whole genome sequences of 55 *C. jejuni* strains isolated from human blood (n=31; strains 2-100) and faeces (n=24; strains 519-542).

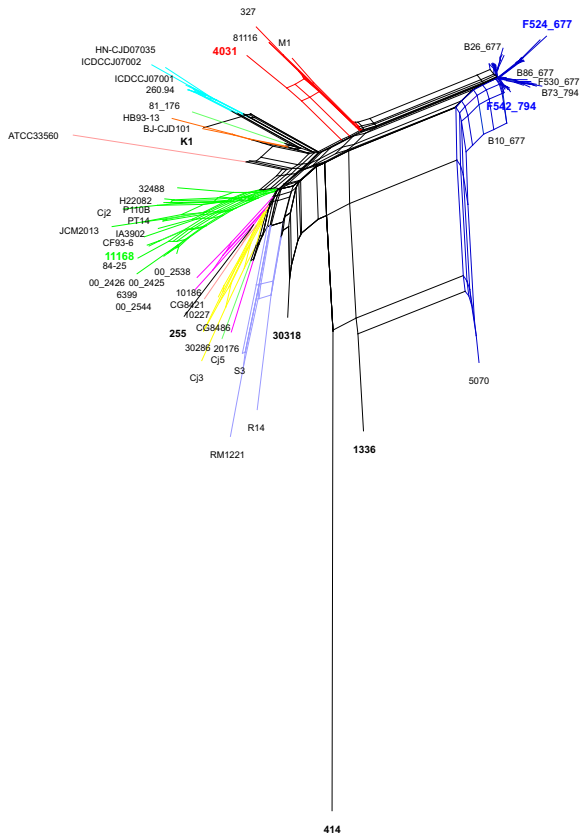

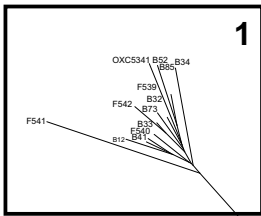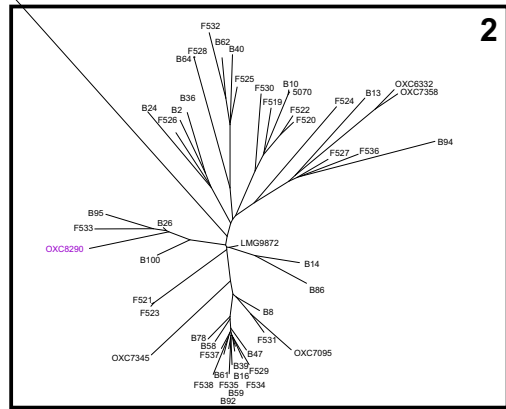

0.002

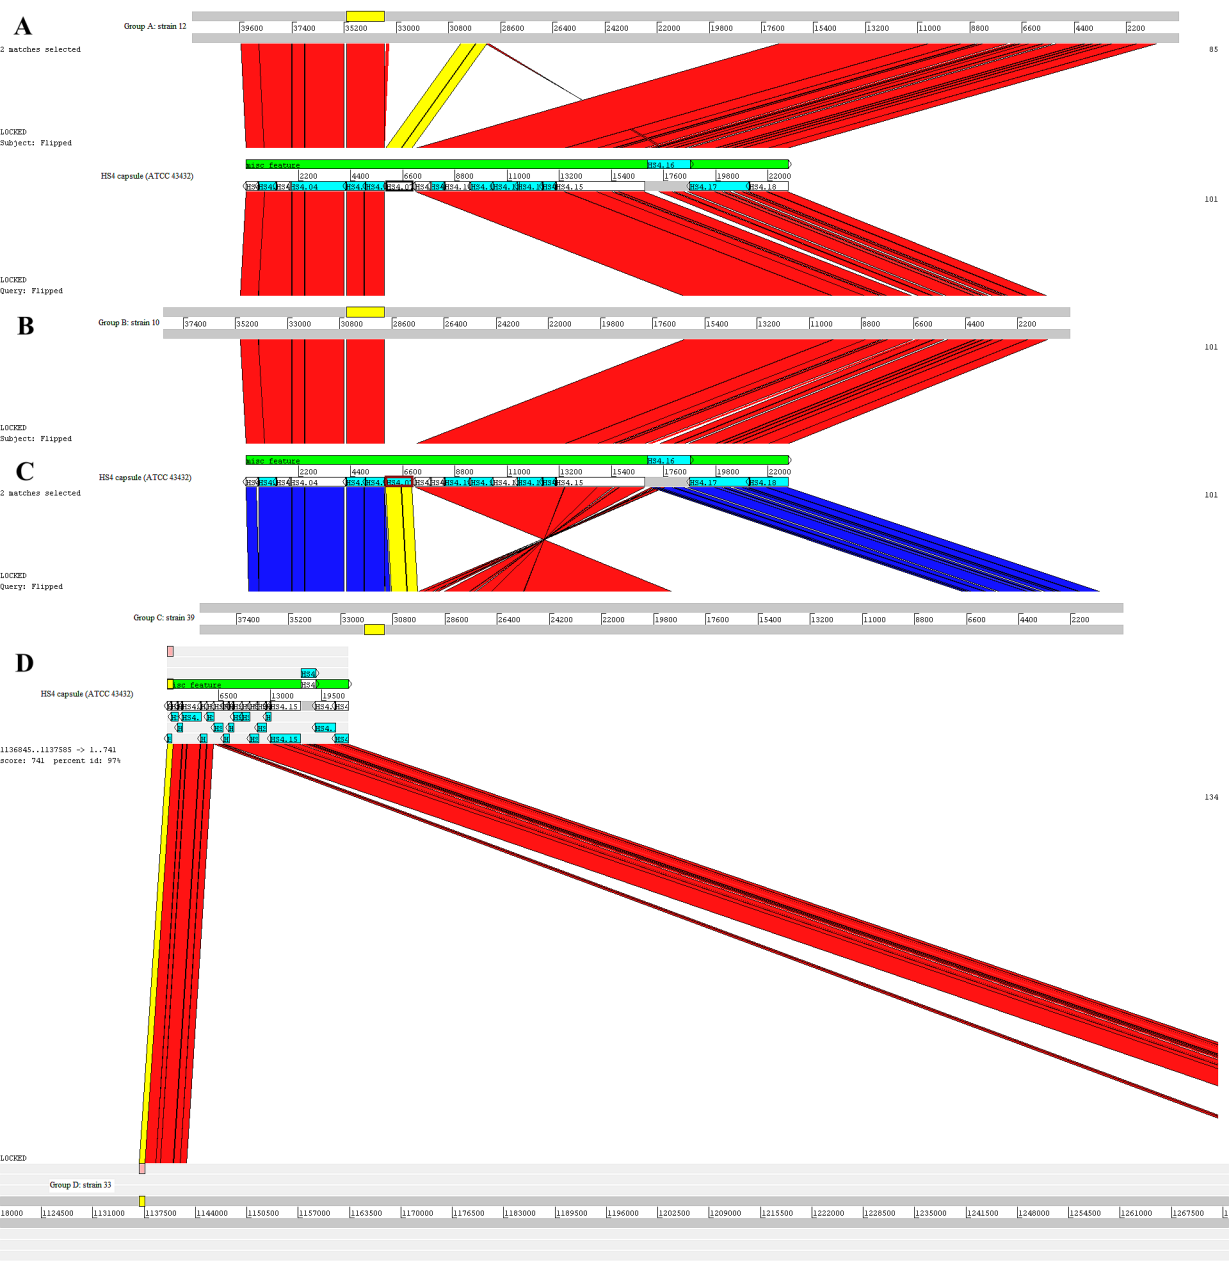

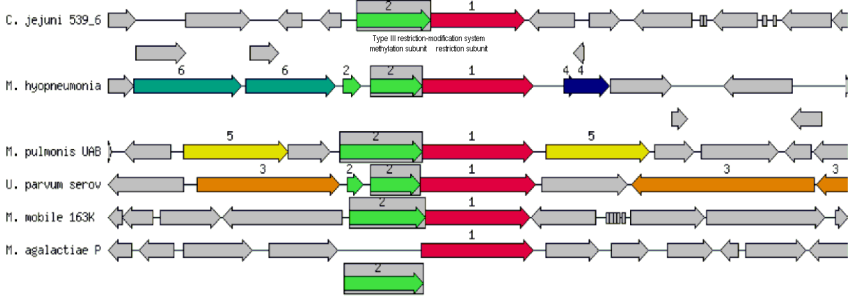

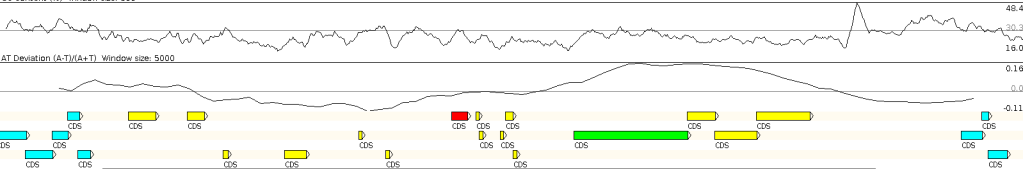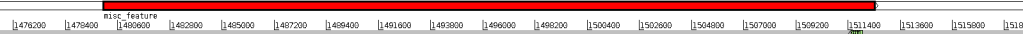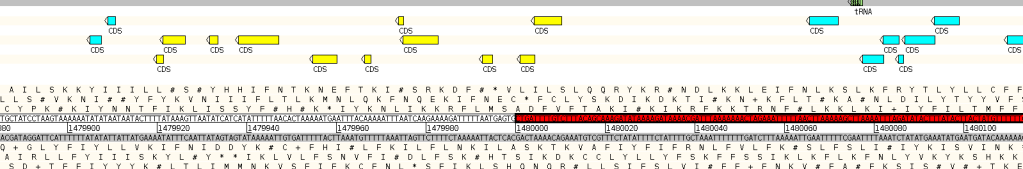

A I L S K K Y I I I L L # S # Y H H I F N T L K N E F T K I # S R K D F # \* V L I L S L Q Q R Y K R # N D L K K L E I F N L K S L K F R Y T L Y L L C F F  
 L L S # V K N I # # Y F L K V N I I I F L T L K M N L Q K F N Q E K I F N E C # F C L Y S K D I K D K T I # K N + K F L T # K A # N L D I L Y T Y V F F  
 C Y P K # K I Y N T N T F I K L I S S Y F # H # K \* I Y K N L I K R F L M S A D F V F T A K I # K I K R F K K T R N F # L K K L K I + I Y F I L T M F F  
 T G T A C T C A A G T A A A A A T A T A T A A T A A C T T T T A A A G T A A T A T C A T C A T A T T T T A A C A C T A A A A A T G A T T T A C A A A A T T T A A T C A A G A A A G A T T T T A T G A G T G  
 A C C A T A G G A T C A T T T T A T A T A T T A T T A G A A A T T C A A T T A T A G A T A T A A A A T T G T G A T T T A C T A A A T G T T T T C A A A A T T A C T C A G C A C T A A A C A G A A A T G T G T T C T A T A T T T C T A T T T G C T A A A T T T T T G A T C T T A A A A A T G A A T T T T C G A A T T T A A A T C T A T A G A A A T A G A T A C A A A A A A  
 A + G L Y F I Y L L V K I F N I D D Y K # C + F H I # L F K I L F L N K I L A S K T K V A F I Y F I F R N L F V L F K # S L F S L I # I Y K I S V N K  
 Q I R L L F Y I I I S K Y L # Y \* I K L V L F S N V F I # D L F S K # H T S I K D K C C L Y L L F S K F F S S I K L F L K I I Y V Y K Y S H K K  
 S D + T F F I Y Y Y K # L T L I M M N K V S F I F K C F N L # S F I K L S H Q N Q R # L L S I F S L V I # F F + F N K V # F A # F K S I S # V # + T K F

| misc feature | 1480300 | 1512500 |                                                |
|--------------|---------|---------|------------------------------------------------|
| CDS          | 1480181 | 1480486 | c FIG00638667: hypothetical protein            |
| CDS          | 1481056 | 1482186 | Integrase                                      |
| CDS          | 1482232 | 1482504 | c hypothetical protein                         |
| CDS          | 1482504 | 1483427 | c hypothetical protein                         |
| CDS          | 1483543 | 1484235 | c hypothetical protein                         |
| CDS          | 1484475 | 1484795 | c hypothetical protein                         |
| CDS          | 1485042 | 1485236 | IncF plasmid conjugative transfer protein TraG |
| CDS          | 1485684 | 1487369 | c hypothetical protein                         |
| CDS          | 1487629 | 1488524 | c hypothetical protein                         |
| CDS          | 1488832 | 1489039 | c FIG00471674: hypothetical protein            |
| CDS          | 1490765 | 1490690 | c hypothetical protein                         |
| CDS          | 1491010 | 1491252 | c hypothetical protein                         |
| CDS          | 1491918 | 1492046 | c hypothetical protein                         |
| CDS          | 1492442 | 1492633 | c conserved hypothetical protein               |
| CDS          | 1492626 | 1494083 | c conserved hypothetical protein               |
| CDS          | 1494689 | 1495338 | DNA/RNA non-specific endonuclease              |
| CDS          | 1495711 | 1495833 | c hypothetical protein                         |
| CDS          | 1495859 | 1495872 | c hypothetical protein                         |
| CDS          | 1495978 | 1496391 | c FIG00469006: hypothetical protein            |



Table S1. List of species included in our  $\epsilon$ -proteobacterial database for orthology querying.

| <b>Species</b>                                   | <b>Strain</b> | <b><i>crp</i>†</b> | <b><i>crp</i> locus tag/Accession</b> |
|--------------------------------------------------|---------------|--------------------|---------------------------------------|
| <i>Campylobacter coli</i>                        | RM2228*       | 1, 2               | 1) CCO0558<br>2) CCO0137              |
| <i>Campylobacter coli</i>                        | BIGS0002*     | 1, 2               |                                       |
| <i>Campylobacter coli</i>                        | BIGS0015*     | 1, 2               |                                       |
| <i>Campylobacter coli</i>                        | BIGS0019*     | 1, 2               |                                       |
| <i>Campylobacter coli</i>                        | BIGS0023*     | 1, 2               |                                       |
| <i>Campylobacter coli</i>                        | BIGS0024*     | 1, 2               |                                       |
| <i>Campylobacter coli</i>                        | BIGS0025*     | 1                  |                                       |
| <i>Campylobacter coli</i>                        | BIGS0001**    | 1, 2               |                                       |
| <i>Campylobacter coli</i>                        | BIGS0010**    | 1, 2               |                                       |
| <i>Campylobacter coli</i>                        | BIGS0011**    | 1, 2               |                                       |
| <i>Campylobacter coli</i>                        | BIGS0012**    | 1                  |                                       |
| <i>Campylobacter coli</i>                        | BIGS0003***   | 1,2                |                                       |
| <i>Campylobacter coli</i>                        | BIGS0008***   | 1, 2               |                                       |
| <i>Campylobacter coli</i>                        | 76339††***    | 1, 2               | 1) BN865_16100c<br>2) BN865_04590c    |
| <i>Campylobacter jejuni</i> subsp. <i>doylei</i> | 269.97        | 1                  | JJD26997_1473                         |
| <i>Campylobacter jejuni</i> subsp. <i>doylei</i> | ATCC 49349    | 1                  | T374_RS0103500                        |
| <i>Campylobacter jejuni</i> subsp. <i>jejuni</i> | NCTC 11168    | 1                  | Cj0466 ( <i>nssR</i> )                |
| <i>Campylobacter jejuni</i> subsp. <i>jejuni</i> | 81-176        | 1                  | CJJ81176_0491                         |
| <i>Campylobacter jejuni</i> subsp. <i>jejuni</i> | 81116         | 1                  | C8J_0439                              |
| <i>Campylobacter jejuni</i> subsp. <i>jejuni</i> | RM1221        | 1                  | CJE0516                               |
| <i>Campylobacter jejuni</i> subsp. <i>jejuni</i> | ATCC 33560    | 1                  | cje135_01931                          |
| <i>Campylobacter jejuni</i> subsp. <i>jejuni</i> | 00-2425       | 1                  | N135_00514                            |
| <i>Campylobacter jejuni</i> subsp. <i>jejuni</i> | 00-2426       | 1                  | N564_00448                            |
| <i>Campylobacter jejuni</i> subsp. <i>jejuni</i> | 00-2538       | 1                  | N565_00499                            |
| <i>Campylobacter jejuni</i> subsp. <i>jejuni</i> | 00-2544       | 1                  | N755_00497                            |
| <i>Campylobacter jejuni</i> subsp. <i>jejuni</i> | 10186         | 1                  | N194_06230                            |
| <i>Campylobacter jejuni</i> subsp. <i>jejuni</i> | 10227         | 1                  | L084_05505                            |
| <i>Campylobacter jejuni</i> subsp. <i>jejuni</i> | 1336          | 1                  | C1336_000070034                       |
| <i>Campylobacter jejuni</i> subsp. <i>jejuni</i> | 20176         | 1                  | N195_09090                            |
| <i>Campylobacter jejuni</i> subsp. <i>jejuni</i> | 255           | 1                  | L034_06335                            |
| <i>Campylobacter jejuni</i> subsp. <i>jejuni</i> | 260.94        | 1, 2               | 1) CJJ26094_0773<br>2) CJJ26094_0107  |
| <i>Campylobacter jejuni</i> subsp. <i>jejuni</i> | 30286         | 1                  | N196_02170                            |
| <i>Campylobacter jejuni</i> subsp. <i>jejuni</i> | 30318         | 1                  | N212_08750                            |
| <i>Campylobacter jejuni</i> subsp. <i>jejuni</i> | 32488         | 1                  | M635_06665                            |
| <i>Campylobacter jejuni</i> subsp. <i>jejuni</i> | 327           | 1                  | CSU_1663                              |
| <i>Campylobacter jejuni</i> subsp. <i>jejuni</i> | 4031          | 1                  | BN867_04360                           |
| <i>Campylobacter jejuni</i> subsp. <i>jejuni</i> | 414           | 1                  | C414_000090034                        |
| <i>Campylobacter jejuni</i> subsp. <i>jejuni</i> | 6399          | 1                  | WP_002851096                          |
| <i>Campylobacter jejuni</i> subsp. <i>jejuni</i> | 84-25         | 1                  | CJJ8425_0490                          |
| <i>Campylobacter jejuni</i> subsp. <i>jejuni</i> | BJ-CJD101     | 1                  | J431_1419                             |

|                                                     |             |      |                                                        |
|-----------------------------------------------------|-------------|------|--------------------------------------------------------|
| <i>Campylobacter jejuni</i> subsp. <i>jejuni</i>    | CF93-6      | 1    | CJJCF936_0492                                          |
| <i>Campylobacter jejuni</i> subsp. <i>jejuni</i>    | CG8421      | 1    | Cj8421_0467                                            |
| <i>Campylobacter jejuni</i> subsp. <i>jejuni</i>    | CG8486      | 1    | Cj8486_0457                                            |
| <i>Campylobacter jejuni</i> subsp. <i>jejuni</i>    | Cj2         | 1    | N215_03885                                             |
| <i>Campylobacter jejuni</i> subsp. <i>jejuni</i>    | Cj3         | 1    | N216_06955                                             |
| <i>Campylobacter jejuni</i> subsp. <i>jejuni</i>    | Cj5         | 1    | N213_08600                                             |
| <i>Campylobacter jejuni</i> subsp. <i>jejuni</i>    | g113        | 1    | K696_RS0102290                                         |
| <i>Campylobacter jejuni</i> subsp. <i>jejuni</i>    | H22082      | 1    | CJJH22082_RS0104305                                    |
| <i>Campylobacter jejuni</i> subsp. <i>jejuni</i>    | HB93-13     | 1    | CJJHB9313_0476                                         |
| <i>Campylobacter jejuni</i> subsp. <i>jejuni</i>    | HN-CJD07035 | 1, 2 | 1) J432_1615<br>2) J432_1025                           |
| <i>Campylobacter jejuni</i> subsp. <i>jejuni</i>    | IA3902      | 1    | CJSA_0436                                              |
| <i>Campylobacter jejuni</i> subsp. <i>jejuni</i>    | ICDCCJ07001 | 1, 2 | 1) ICDCCJ07001_426<br>2) ICDCCJ07001_78                |
| <i>Campylobacter jejuni</i> subsp. <i>jejuni</i>    | ICDCCJ07002 | 1, 2 | 1) H840_1673<br>2) H840_1029                           |
| <i>Campylobacter jejuni</i> subsp. <i>jejuni</i>    | JCM2013     | 1    | JCM2013_RS00825                                        |
| <i>Campylobacter jejuni</i> subsp. <i>jejuni</i>    | K1          | 1, 2 | 1) N217_06470<br>2) N217_08280                         |
| <i>Campylobacter jejuni</i> subsp. <i>jejuni</i>    | LMG 9872    | 1, 2 | 1) Cje89_033337<br>2) Cje89_02922                      |
| <i>Campylobacter jejuni</i> subsp. <i>jejuni</i>    | M1          | 1    | CJM1_0448                                              |
| <i>Campylobacter jejuni</i> subsp. <i>jejuni</i>    | OXC5341     | 1, 2 |                                                        |
| <i>Campylobacter jejuni</i> subsp. <i>jejuni</i>    | OXC6332     | 1, 2 |                                                        |
| <i>Campylobacter jejuni</i> subsp. <i>jejuni</i>    | OXC7095     | 1, 2 |                                                        |
| <i>Campylobacter jejuni</i> subsp. <i>jejuni</i>    | OXC7345     | 1, 2 |                                                        |
| <i>Campylobacter jejuni</i> subsp. <i>jejuni</i>    | OXC7358     | 1, 2 |                                                        |
| <i>Campylobacter jejuni</i> subsp. <i>jejuni</i>    | OXC8290     | 1, 2 |                                                        |
| <i>Campylobacter jejuni</i> subsp. <i>jejuni</i>    | P110B       | 1    | CJJP110B_RS0104305                                     |
| <i>Campylobacter jejuni</i> subsp. <i>jejuni</i>    | PT14        | 1    | A911_02275                                             |
| <i>Campylobacter jejuni</i> subsp. <i>jejuni</i>    | R14         | 1    | H730_02910                                             |
| <i>Campylobacter jejuni</i> subsp. <i>jejuni</i>    | S3          | 1    | CJS3_0458                                              |
| <i>Campylobacter fetus</i> subsp. <i>fetus</i>      | 82-40       | 2, 3 | 2) CFF8240_0798<br>3) CFF8240_0428                     |
| <i>Campylobacter fetus</i> subsp. <i>testudinum</i> | 03-427      | 2, 3 | 2) CFT03427_0437;<br>CFT03427_1019<br>3) CFT03427_0790 |
| <i>Campylobacter fetus</i> subsp. <i>venerealis</i> | cfvi03/293  | 2, 3 | 2) CFVI03293_0425<br>3) CFVI03293_0951                 |
| <i>Campylobacter fetus</i> subsp. <i>venerealis</i> | NCTC 10354  | 2, 3 | 2) CFV354_0489<br>3) CFV354_0872                       |
| <i>Campylobacter lari</i>                           | RM2100      | 1, 2 | 1) Cla_0689<br>2) Cla_1155                             |
| <i>Campylobacter concisus</i>                       | 13826       | 3    | CCC13826_1550                                          |
| <i>Campylobacter concisus</i>                       | ATCC 51561  | 3    | ATCC51561_651                                          |

|                                   |              |         |                                                          |
|-----------------------------------|--------------|---------|----------------------------------------------------------|
| <i>Campylobacter concisus</i>     | ATCC 51562   | 2, 3    | 2) ATCC51562_1399<br>3) ATCC51562_365                    |
| <i>Campylobacter concisus</i>     | UNSWCD       | 3       | UNSWCD_209                                               |
| <i>Campylobacter curvus</i>       | 525.92       | 3       | CCV52592_0436                                            |
| <i>Campylobacter curvus</i>       | DSM6644      | 2, 3    | 2) C514_RS0107125<br>3) C514_RS0105485                   |
| <i>Campylobacter upsaliensis</i>  | DSM5365      | 2       | Q327_RS0102540                                           |
| <i>Campylobacter upsaliensis</i>  | JV21         | 2       | HMPREF9400_0311                                          |
| <i>Campylobacter upsaliensis</i>  | RM3195       | 2       | CUP0987                                                  |
| <i>Arcobacter butzleri</i>        | ED1          | 3       | ABED_0342; ABED_1940                                     |
| <i>Arcobacter butzleri</i>        | JV22         | 3       | HMPREF9401_0465;<br>HMPREF9401_1276                      |
| <i>Arcobacter butzleri</i>        | RM4018       | 3       | Abu_0367                                                 |
| <i>Helicobacter pylori</i>        | 26695        | -       |                                                          |
| <i>Helicobacter pylori</i>        | HPAG1        | -       |                                                          |
| <i>Helicobacter pylori</i>        | J99          | -       |                                                          |
| <i>Helicobacter pylori</i>        | PeCan18      | -       |                                                          |
| <i>Helicobacter acinonychis</i>   | Sheeba       | -       |                                                          |
| <i>Helicobacter bilis</i>         | ATCC 43879   | 1, 2    | 1) HRAG_01781<br>2) HRAG_00942                           |
| <i>Helicobacter bilis</i>         | ATCC 51630   | 1       | T368_RS0107190                                           |
| <i>Helicobacter bizzozeronii</i>  | CIII1        | -       |                                                          |
| <i>Helicobacter canadensis</i>    | MIT98-5491   | 1, 2, 3 | 1) HCMG_01580<br>2) HCMG_01531<br>3) HCMG_00288          |
| <i>Helicobacter cetorum</i>       | 00-7128      | -       |                                                          |
| <i>Helicobacter cetorum</i>       | MIT99-5656   | -       |                                                          |
| <i>Helicobacter cinaedi</i>       | ATCC BAA-847 | 1, 2, 3 | 1) HCBAA847_1282<br>2) HCBAA847_2282<br>3) HCBAA847_0807 |
| <i>Helicobacter cinaedi</i>       | CCUG18818    | 1, 2, 3 | 1) HCCG_01607<br>2) HCCG_00684<br>3) HCCG_01135          |
| <i>Helicobacter cinaedi</i>       | PAGU611      | 1, 2, 3 | 1) HCN_0709<br>2) HCN_2022<br>3) HCN_1161                |
| <i>Helicobacter hepaticus</i>     | ATCC 51449   | 1, 2, 3 | 1) HH0166<br>2) HH1150<br>3) HH0012                      |
| <i>Helicobacter mustelae</i>      | 12198        | -       |                                                          |
| <i>Helicobacter pullorum</i>      | MIT98-5489   | 1, 2    | 1) HPMG_00981<br>2) HPMG_01899                           |
| <i>Helicobacter winghamensis</i>  | ATCC BAA-430 | 1, 2    | 1) HWAG_00610<br>2) HWAG_00492                           |
| <i>Sulfurimonas denitrificans</i> | DSM1251      | 3       | Suden_1312/_1296/_1512                                   |

*Wolinella succinogenes*

DSM1740

1, 3

1) WS1193

3) WS0913 (*dnr*)/WS1181

---

\*Clade 1 *C. coli* (Sheppard *et al.* 2008, 2013)

\*\*Clade 2 *C. coli* (Sheppard *et al.* 2008, 2013)

\*\*\*Clade 3 *C. coli* (Sheppard *et al.* 2008, 2013)

†*crp*: 1) *Cj0466*-like; 2) ST677CC-like; 3) Other; -) absent

††Skarp-de Haan *et al.* 2014

\*\*\*\*Strain belonging to the Oxfordshire sentinel surveillance scheme for human campylobacteriosis in Oxfordshire, UK. Deposited in the PubMLST database at [pubmlst.org/campylobacter](http://pubmlst.org/campylobacter)

Table S2. BlastP results of the ST-794 Type III res subunit against the Concise Microbial Protein Database

| <b>Organism</b>                                               | <b>Accession</b> | <b>Length (aa)</b> | <b>Locus tag</b> | <b>E-value</b> | <b>Score</b> |
|---------------------------------------------------------------|------------------|--------------------|------------------|----------------|--------------|
| <i>C. jejuni</i> strain 539                                   | CP010457         | 672                | RC45_08390       | -              | -            |
| <i>Helicobacter acinonychis</i> str. Sheeba                   | YP_664513        | 673                | Hac_0712         | 0              | 633.26       |
| <i>Mycoplasma conjunctivae</i> HRC/581                        | YP_002960738     | 819                | MCJ_002240       | 2.77785e-30    | 129.835      |
| <i>Mycoplasma agalactiae</i> PG2                              | YP_001256295     | 807                | MAG_1520         | 2.16259e-20    | 100.737      |
| <i>Aggregatibacter aphrophilus</i> NJ8700                     | YP_003007037     | 762                | NT05HA_0537      | 5.02033e-12    | 74.4441      |
| <i>Parabacteroides distasonis</i> ATCC 8503                   | YP_001303488     | 781                | BDI_2135         | 7.606e-12      | 74.0935      |
| <i>Streptobacillus moniliformis</i> DSM 12112                 | YP_003306730     | 751                | Smon_1418        | 5.92191e-11    | 71.2889      |
| <i>Herminiimonas arsenicoxydans</i>                           | YP_001099019     | 840                | HEAR0698         | 1.51159e-06    | 57.2659      |
| <i>Eubacterium rectale</i> ATCC 33656                         | YP_002937217     | 887                | EUBREC_1323      | 0.000273293    | 50.2544      |
| <i>Bradyrhizobium</i> sp. ORS 278                             | YP_001203507     | 824                | BRADO1376        | 0.000763836    | 48.8521      |
| <i>Bacillus cereus</i> B4264                                  | YP_002365706     | 892                | BCB4264_A0973    | 0.00134965     | 48.151       |
| <i>Xanthomonas campestris</i> pv. <i>campestris</i> str. B100 | YP_001902467     | 882                | xccb100_1061     | 0.00564767     | 46.0475      |

Table S3. Accession numbers of the whole genome sequences of 55 *C. jejuni* strains isolated from human blood (n=31; strains 2-100) and faeces (n=24; strains 519-542).

| <b>Strain</b> | <b>Accession</b> |
|---------------|------------------|
| 2             | CP010472         |
| 8             | CP010465         |
| 10            | CP010478         |
| 12            | CP010487         |
| 13            | CP010461         |
| 14            | CP010502         |
| 16            | CP010481         |
| 24            | CP010467         |
| 26            | CP010470         |
| 32            | CP010496         |
| 33            | CP010497         |
| 34            | CP010484         |
| 36            | CP010479         |
| 39            | CP010503         |
| 40            | CP010510         |
| 41            | CP010482         |
| 47            | CP010459         |
| 52            | CP010505         |
| 58            | CP010460         |
| 59            | CP010494         |
| 61            | CP010511         |
| 62            | CP010493         |
| 64            | CP010468         |
| 73            | CP010475         |
| 78            | CP010507         |
| 85            | CP010504         |
| 86            | CP010485         |
| 92            | CP010488         |
| 94            | CP010464         |

|     |          |
|-----|----------|
| 95  | CP010486 |
| 100 | CP010462 |
| 519 | CP010471 |
| 520 | CP010501 |
| 521 | CP010476 |
| 522 | CP010463 |
| 523 | CP010508 |
| 524 | CP010480 |
| 525 | CP010469 |
| 526 | CP010477 |
| 527 | CP010506 |
| 528 | CP010500 |
| 529 | CP010491 |
| 530 | CP010489 |
| 531 | CP010492 |
| 532 | CP010490 |
| 533 | CP010458 |
| 534 | CP010473 |
| 535 | CP010483 |
| 536 | CP010474 |
| 537 | CP010498 |
| 538 | CP010495 |
| 539 | CP010457 |
| 540 | CP010509 |
| 541 | CP010466 |
| 542 | CP010499 |

---
